# Supplementary material
Source: PubMed Central journal article supplement (PMC6889711)
Supplement: supp_RA119000200_153546_1_supp_399176_py8t5s.pdf [file supp_RA119000200_153546_1_supp_399176_py8t5s.pdf]

# SUPPLEMENTAL FIGURE 4

| Gene          | A                            | B | C | D | E | F | G |
|---------------|------------------------------|---|---|---|---|---|---|
|               | <b>Lysozymes</b>             |   |   |   |   |   |   |
| <i>Lyz1</i>   |                              |   |   |   |   |   |   |
| <i>Lyz2</i>   |                              |   |   |   |   |   |   |
|               | <b>Alpha Defensin Family</b> |   |   |   |   |   |   |
| <i>Defa3</i>  |                              | * |   |   | * |   |   |
| <i>Defa5</i>  | *                            | * |   |   |   |   |   |
| <i>Defa17</i> |                              | * | * |   |   | * |   |
| <i>Defa20</i> |                              |   |   |   |   |   |   |
| <i>Defa21</i> | *                            |   |   |   |   |   |   |
| <i>Defa22</i> |                              |   |   |   |   |   |   |
| <i>Defa23</i> |                              | * | * |   |   | * |   |
| <i>Defa24</i> |                              |   |   |   |   |   |   |
| <i>Defa26</i> |                              |   |   |   | * |   |   |
|               | <b>Reg3 Family</b>           |   |   |   |   |   |   |
| <i>Reg3a</i>  | *                            | * | * |   | * | * |   |
| <i>Reg3b</i>  |                              |   |   |   |   |   |   |
| <i>Reg3g</i>  |                              |   |   |   |   |   |   |
| <i>Reg3d</i>  |                              |   |   |   | * |   |   |

A: WT PF / *fat-1* PF  
 B: WT Et / WT PF  
 C: *fat-1* Et / *fat-1* 1 PF  
 D: WT Et / *fat-1* Et  
 E: WT Et+LPS / WT Et  
 F: *fat-1* Et+LPS / *fat-1* Et  
 G: WT Et+LPS / *fat-1* Et+LPS

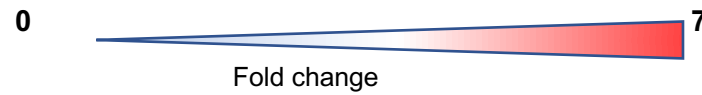

Statistical significance \* P < 0.05
